# Supplementary material for: Two Cases of Recessive Intellectual Disability Caused by NDST1 and METTL23 Variants
Source: PubMed Central journal article supplement (PMC7563614; doi:10.3390/genes11091021), 2020-08-31
Supplement: genes-11-01021-s001.pdf [file genes-11-01021-s001.pdf]

1 Supplemental Table 1. **Details of variants identified in *NDST1* and *METTL23*.**

| Gene              | DNA Variation  | Protein Variation | Variant Type         | Reported phenotype                                                               | Reference <sup>1</sup>   |
|-------------------|----------------|-------------------|----------------------|----------------------------------------------------------------------------------|--------------------------|
| <i>NDST1</i>      | c.985C>T       | p.Arg329Cys       | Missense             | Hypotonia & seizures                                                             | (Monies et al., 2017)    |
|                   | deletion 70 kb | -                 | Deletion             | Autism spectrum disorder                                                         | (Bitar et al., 2019)     |
|                   | c.1114G>T      | p.Ala372Ser       | Missense             | Developmental delay, ataxia, cranial nerve palsies & severe respiratory problems | (Armstrong et al., 2017) |
|                   | c.1360C>T      | p.Arg454Cys       | Missense             | Developmental delay, coarse facies                                               | (Gupta et al. 2019)      |
|                   | 1766A>G        | p.Lys589Arg       | Missense             | Epilepsy, early-onset                                                            | (Demos et al., 2019)     |
|                   | c.1831G>A      | p.Gly611Ser       | Missense             | Intellectual disability                                                          | (Reuter et al., 2014)    |
|                   | c.1918T>C      | p.Phe640Leu       | Missense             | Intellectual disability                                                          | (Reuter et al., 2014)    |
|                   | c.1926G>T      | p.Glu642Asp       | Missense             | Intellectual disability                                                          | (Reuter et al., 2014)    |
|                   | c.2126G>A      | p.Arg709Gln       | Missense             | Intellectual disability                                                          | (Reuter et al., 2014)    |
|                   | c.2207C>T      | p.Ala736Val       | Missense             | Developmental delay, ataxia, cranial nerve palsies & severe respiratory problems | (Armstrong et al., 2017) |
|                   | c.2218G>A      | p.Ala740Thr       | Missense             | Epilepsy, early-onset                                                            | (Demos et al., 2019)     |
|                   | c.1966G>A      | p.Asp656Asn       | Missense             | Intellectual disability                                                          | This study               |
|                   | <i>METTL23</i> | c.169_172delCACT  | p.(His57Valfs*11)    | Frameshift Deletion                                                              | Intellectual disability  |
| c.176_177insG     |                | p.Glu60Glyfs*11   | Frameshift Insertion | Intellectual disability                                                          | (Smaili et al., 2020)    |
| c.204_206delGAA   |                | p.Met68del        | Inframe Deletion     | Autism spectrum disorder                                                         | (Iossifov et al., 2014)  |
| c.237_241delAACAT |                | p.(Thr80Glyfs*20) | Frameshift Deletion  | Intellectual disability                                                          | (Harripaul et al., 2018) |
| c.282_286delAGATA |                | p.(Gln94Hisfs*6)  | Frameshift Deletion  | Intellectual disability                                                          | (Bernkopf et al., 2014)  |
| c.322+2T>C        |                | -                 | Canonical-splice     | Intellectual disability                                                          | (Almannai et al., 2020)  |
| c.397C>T          |                | p.Gln133*         | Nonsense             | Intellectual disability                                                          | (Bernkopf et al., 2014)  |
| c.407+1G>C        |                | -                 | Canonical-splice     | Intellectual disability                                                          | (Almannai et al., 2020)  |
| c.449T>C          |                | Met150Thr         | Missense             | Intellectual disability                                                          | (Almannai et al., 2020)  |
| c.470_471delTT    |                | p.(Leu157Argfs*4) | Frameshift Deletion  | Intellectual disability                                                          | (Almannai et al., 2020)  |
| c.310T>C          |                | p.Phe104Leu       | Missense             | Intellectual disability                                                          | This Study               |

2 <sup>1</sup> References

3 Almannai, M.; Obaid, O.; Faqeih, E.; Alasmari, A.; Samman, M.M.; Pinz, H.; Braddock, S.R.; Alkuraya, F.S. Further  
4 delineation of METTL23-associated intellectual disability. *American journal of medical genetics. Part A* 2020, 182,  
5 785-791, doi:10.1002/ajmg.a.61503.

6  
7 Armstrong, L., Tarailo-Graovac, M., Sinclair, G., Seath, K.I., Wasserman, W.W., Ross, C.J., van Karnebeek, C.D., 2017.  
8 A girl with developmental delay, ataxia, cranial nerve palsies, severe respiratory problems in infancy-Expanding  
9 NDST1 syndrome. *American journal of medical genetics. Part A* 173(3), 712-715.

10  
11 Bernkopf, M., Webersinke, G., Tongsook, C., Koyani, C.N., Rafiq, M.A., Ayaz, M., Muller, D., Enzinger, C., Aslam, M.,  
12 Naeem, F., Schmidt, K., Gruber, K., Speicher, M.R., Malle, E., Macheroux, P., Ayub, M., Vincent, J.B., Windpassinger,

- 13 C., Duba, H.C., 2014. Disruption of the methyltransferase-like 23 gene METTL23 causes mild autosomal recessive  
14 intellectual disability. *Human molecular genetics* 23(15), 4015-4023.
- 15
- 16 Bitar, T., Hleihel, W., Marouillat, S., Vonwill, S., Vuillaume, M.L., Soufia, M., Vourc'h, P., Laumonier, F., Andres,  
17 C.R., 2019. Identification of rare copy number variations reveals PJA2, APCS, SYNPO, and TAC1 as novel candidate  
18 genes in Autism Spectrum Disorders. *Molecular genetics & genomic medicine* 7(8), e786.
- 19
- 20 Demos, M., Guella, I., DeGuzman, C., McKenzie, M.B., Buerki, S.E., Evans, D.M., Toyota, E.B., Boelman, C., Huh, L.L.,  
21 Datta, A., Michoulas, A., Selby, K., Bjornson, B.H., Horvath, G., Lopez-Rangel, E., van Karnebeek, C.D.M.,  
22 Salvarinova, R., Slade, E., Eydoux, P., Adam, S., Van Allen, M.I., Nelson, T.N., Bolbocean, C., Connolly, M.B., Farrer,  
23 M.J., 2019. Diagnostic Yield and Treatment Impact of Targeted Exome Sequencing in Early-Onset Epilepsy. *Frontiers*  
24 *in neurology* 10, 434.
- 25
- 26 Harripaul, R., Vasli, N., Mikhailov, A., Rafiq, M.A., Mittal, K., Windpassinger, C., Sheikh, T.I., Noor, A., Mahmood,  
27 H., Downey, S., Johnson, M., Vleuten, K., Bell, L., Ilyas, M., Khan, F.S., Khan, V., Moradi, M., Ayaz, M., Naeem, F.,  
28 Heidari, A., Ahmed, I., Ghadami, S., Agha, Z., Zeinali, S., Qamar, R., Mozhdehipanah, H., John, P., Mir, A., Ansar, M.,  
29 French, L., Ayub, M., Vincent, J.B., 2018. Mapping autosomal recessive intellectual disability: combined microarray  
30 and exome sequencing identifies 26 novel candidate genes in 192 consanguineous families. *Molecular psychiatry*  
31 23(4), 973-984.
- 32
- 33 Iossifov, I., O'Roak, B.J., Sanders, S.J., Ronemus, M., Krumm, N., Levy, D., Stessman, H.A., Witherspoon, K.T., Vives,  
34 L., Patterson, K.E., Smith, J.D., Paepier, B., Nickerson, D.A., Dea, J., Dong, S., Gonzalez, L.E., Mandell, J.D., Mane, S.M.,  
35 Murtha, M.T., Sullivan, C.A., Walker, M.F., Waqar, Z., Wei, L., Willsey, A.J., Yamrom, B., Lee, Y.H., Grabowska, E.,  
36 Dalkic, E., Wang, Z., Marks, S., Andrews, P., Leotta, A., Kendall, J., Hakker, I., Rosenbaum, J., Ma, B., Rodgers, L.,  
37 Troge, J., Narzisi, G., Yoon, S., Schatz, M.C., Ye, K., McCombie, W.R., Shendure, J., Eichler, E.E., State, M.W., Wigler,  
38 M., 2014. The contribution of de novo coding mutations to autism spectrum disorder. *Nature* 515(7526), 216-221.
- 39
- 40 Monies, D., Abouelhoda, M., AlSayed, M., Alhassnan, Z., Alotaibi, M., Kayyali, H., Al-Owain, M., Shah, A., Rahbeeni,  
41 Z., Al-Muhaizea, M.A., Alzaidan, H.I., Cupler, E., Bohlega, S., Faqeih, E., Faden, M., Alyounes, B., Jaroudi, D., Goljan,  
42 E., Elbardisy, H., Akilan, A., Albar, R., Aldhalaan, H., Gulab, S., Chedrawi, A., Al Saud, B.K., Kurdi, W., Makhseed,  
43 N., Alqasim, T., El Khashab, H.Y., Al-Mousa, H., Alhashem, A., Kanaan, I., Algoufi, T., Alsaleem, K., Basha, T.A., Al-  
44 Murshedi, F., Khan, S., Al-Kindy, A., Alnemer, M., Al-Hajjar, S., Alyamani, S., Aldhekri, H., Al-Mehaidib, A.,  
45 Arnaout, R., Dabbagh, O., Shagrani, M., Broering, D., Tulbah, M., Alqassmi, A., Almugbel, M., AlQuaiz, M., Alsaman,  
46 A., Al-Thihli, K., Sulaiman, R.A., Al-Dekhail, W., Alsaegh, A., Bashiri, F.A., Qari, A., Alhomadi, S., Alkuraya, H.,  
47 Alsebayel, M., Hamad, M.H., Szonyi, L., Abaalkhail, F., Al-Mayouf, S.M., Almojalli, H., Alqadi, K.S., Elsiey, H.,  
48 Shuaib, T.M., Seidahmed, M.Z., Abosoudah, I., Akleh, H., AlGhonaïum, A., Alkharfy, T.M., Al Mutairi, F., Eyaid, W.,  
49 Alsharbary, A., Sheikh, F.R., Alsohaibani, F.I., Alsonbul, A., Al Tala, S., Balkhy, S., Bassiouni, R., Alenizi, A.S.,  
50 Hussein, M.H., Hassan, S., Khalil, M., Tabarki, B., Alshahwan, S., Oshi, A., Sabr, Y., Alsaadoun, S., Salih, M.A.,  
51 Mohamed, S., Sultana, H., Tamim, A., El-Haj, M., Alshahrani, S., Bubshait, D.K., Alfadhel, M., Faquih, T., El-Kalioby,  
52 M., Subhani, S., Shah, Z., Moghrabi, N., Meyer, B.F., Alkuraya, F.S., 2017. The landscape of genetic diseases in Saudi  
53 Arabia based on the first 1000 diagnostic panels and exomes. *Human genetics* 136(8), 921-939.
- 54
- 55 Reiff, R.E., Ali, B.R., Baron, B., Yu, T.W., Ben-Salem, S., Coulter, M.E., Schubert, C.R., Hill, R.S., Akawi, N.A., Al-  
56 Younes, B., Kaya, N., Evrony, G.D., Al-Saffar, M., Felie, J.M., Partlow, J.N., Sunu, C.M., Schembri-Wismayer, P.,

57 Alkuraya, F.S., Meyer, B.F., Walsh, C.A., Al-Gazali, L., Mochida, G.H., 2014. METTL23, a transcriptional partner of  
58 GABPA, is essential for human cognition. *Human molecular genetics* 23(13), 3456-3466.

59

60 Reuter, M.S., Musante, L., Hu, H., Diederich, S., Sticht, H., Ekici, A.B., Uebe, S., Wienker, T.F., Bartsch, O., Zechner,  
61 U., Oppitz, C., Keleman, K., Jamra, R.A., Najmabadi, H., Schweiger, S., Reis, A., Kahrizi, K., 2014. NDST1 missense  
62 mutations in autosomal recessive intellectual disability. *American journal of medical genetics. Part A* 164A(11), 2753-  
63 2763.

64

65 Smaili, W.; Elalaoui, S.C.; Zrhidri, A.; Raymond, L.; Egea, G.; Taoudi, M.; Mouatassim, S.E.L.; Sefiani, A.; Lyahyai, J.  
66 Exome sequencing revealed a novel homozygous METTL23 gene mutation leading to familial mild intellectual  
67 disability with dysmorphic features. *European journal of medical genetics* 2020, 63, 103951,  
68 doi:10.1016/j.ejmg.2020.103951.

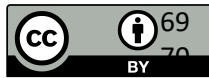

71

© 2020 by the authors. Submitted for possible open access publication under the  
terms and conditions of the Creative Commons Attribution (CC BY) license  
(<http://creativecommons.org/licenses/by/4.0/>).
